# Supplementary material for: Single-colony sequencing reveals microbe-by-microbiome phylosymbiosis between the cyanobacterium Microcystis and its associated bacteria
Source: PubMed Central journal article supplement (PMC8477515; doi:10.1186/s40168-021-01140-8), 2021-09-27
Supplement: 40168_2021_1140_MOESM5_ESM.pdf [file 40168_2021_1140_MOESM5_ESM.pdf]

## Supplementary figure legends

**Figure 1.** ML Phylogenetic tree of *Microcystis* genomes (a) and ANIm clusters (b) corresponding to monophyletic clades with ANI values greater or equal to 99%.

**Figure 2.** Phylogenetic tree of *Microcystis* and 72 associated species (391 MAGs) recovered from *Microcystis* colonies. Taxonomic annotation for the genomes to different genera and species was done using Blastp of the RecA and RpoB proteins against the NCBI database and then complemented using the Genome Taxonomy Database Toolkit (GTDB-Tk) v1.0.2. The colored circles indicate the most prevalent genera in the *Microcystis* colony Microbiome.

**Figure 3.** Associated bacteria prevalence in the *Microcystis* colony microbiome from Canada and Brazil. Based on the normalized read coverages greater or equal than 1%, we recalculated the richness or number of associated species to the *Microcystis* colonies. The length of the whiskers represents 1.5 times of the interquartile range (IQR). The black line within each box represent the median. The lower and upper hinges represent the first and third quartiles.

**Figure 4.** Read cut-off values vs size of the core microbiome based on the Kaiju read counts and taxonomical annotation.

**Figure 5.** *Microcystis* genotype diversity over time in environmental metagenomes from Lake Champlain. Using MIDAS software, we estimated the relative abundances (a) and the read coverage (b) of the *Microcystis* genotypes in 72 shotgun metagenomes from Lake Champlain,

Quebec (62 metagenomes from a long-term experiment (2006 to 2016), plus 10 metagenomes from 2017 and 2018). The metagenomes with *Microcystis* genotype coverage lower than 1 or incomplete metadata were excluded.

**Figure 6.** *Microcystis* genotypic diversity variation over time. We used dbRDA (a) and NMDS (b) to ordinate the metagenome samples from Quebec based on the Bray–Curtis dissimilarities of the normalized coverage of *Microcystis* genotypes (NMDS stress value = 0.0859).

**Figure 7.** *Microcystis* genotype diversity over time in environmental metagenomes from Pampulha reservoir. The figure shows the relative abundances (a) and the read coverage (b). The genotypes containing the *mcy* cluster are indicated with an asterisk.

**Figure 8.** Associated bacteria (AB) diversity variation over time. We used dbRDA (a) and non-NMDS (b) to ordinate the metagenome samples from Quebec based on the Bray–Curtis dissimilarities of the normalized coverage of the AB species (NMDS stress value = 0.1569).

**Figure 9.** *Microcystis*, *Dolichospermum* and associated bacteria species coverage in environmental metagenomes across time. Figure 8a shows the *Microcystis* and *Dolichospermum* normalized read coverages across time. Figure 8b shows the *Microcystis*-associated bacteria genus read coverage.

**Figure 10.** Certain associated bacteria species are well correlated with the presence of *Microcystis*. Spearman correlation coefficients were estimated between *Microcystis* and each associated

bacterium and between *Dolichospermum* and each associated bacterium. Figure 9a shows the comparisons at genus level and Figure 9b the comparisons at species level. The axis x was sorted according with the genus and species prevalence in the *Microcystis* colonies from Canada. The correlations between the AB and *Microcystis* were also estimated using fastspar (Figure 9c and 9d).

**Figure 11.** *Microcystis* abundances are correlated with the nine most prevalent members of the microbiome in Lake Champlain. The scatter plots show the Spearman correlation between *Microcystis* and a particular AB or between *Dolichospermum* and a particular AB. The x and y axes show the log<sub>2</sub> transformed read counts for *Microcystis* and each AB in the environmental metagenomes.

**Figure 12.** Scatter plot showing the relation between AB genera prevalence in the *Microcystis* colonies and the correlations values (Spearman and SparCC). The strongest correlated AB are those with the highest prevalence values.

**Figure 13.** *Microcystis* genotype-specific associations with associated bacteria species in environmental metagenomes. Normalized read counts were estimated per each *Microcystis* genotype and the associated bacteria species in 72 environmental metagenomes. The Spearman correlation coefficients were estimated between each *Microcystis* genotype and each associated bacteria species (Figure 12a). The correlations were also estimated using fastspar (Figure 12b).

**Figure 14.** PCA based on the presence absence of KEGG Orthologous genes in *Microcystis* and associated bacteria genera.

**Figure 15.** Number of colonies sequenced per each sampling point in Lake Champlain and Pampulha reservoir.

**Figure 16.** Pictures of the isolated and sequenced colonies.

**Figure 17.** Distribution of contigs sizes for each *Microcystis* colony metagenome assembly. The figure shows the kernel density estimations based on the contigs size in each metagenome assembly. Each colored line represents a metagenomic assembly. Noted that the individual assemblies generally contain an important number of contigs with sizes lower than 2,500 bp. The density estimations were plotted using the program ggplot2[1].

**Figure 18.** ML phylogenetic tree of *Microcystis* genomes without outgroups.

**Figure 19.** MIDAS workflow used to analyze the *Microcystis* colony and metagenome community composition.

**Figure 20.** Pearson correlation between *Microcystis* genotype coverage with alignment identity of  $\geq 99\%$  and *Microcystis* reference coverage with alignment identity of  $\geq 96\%$ .

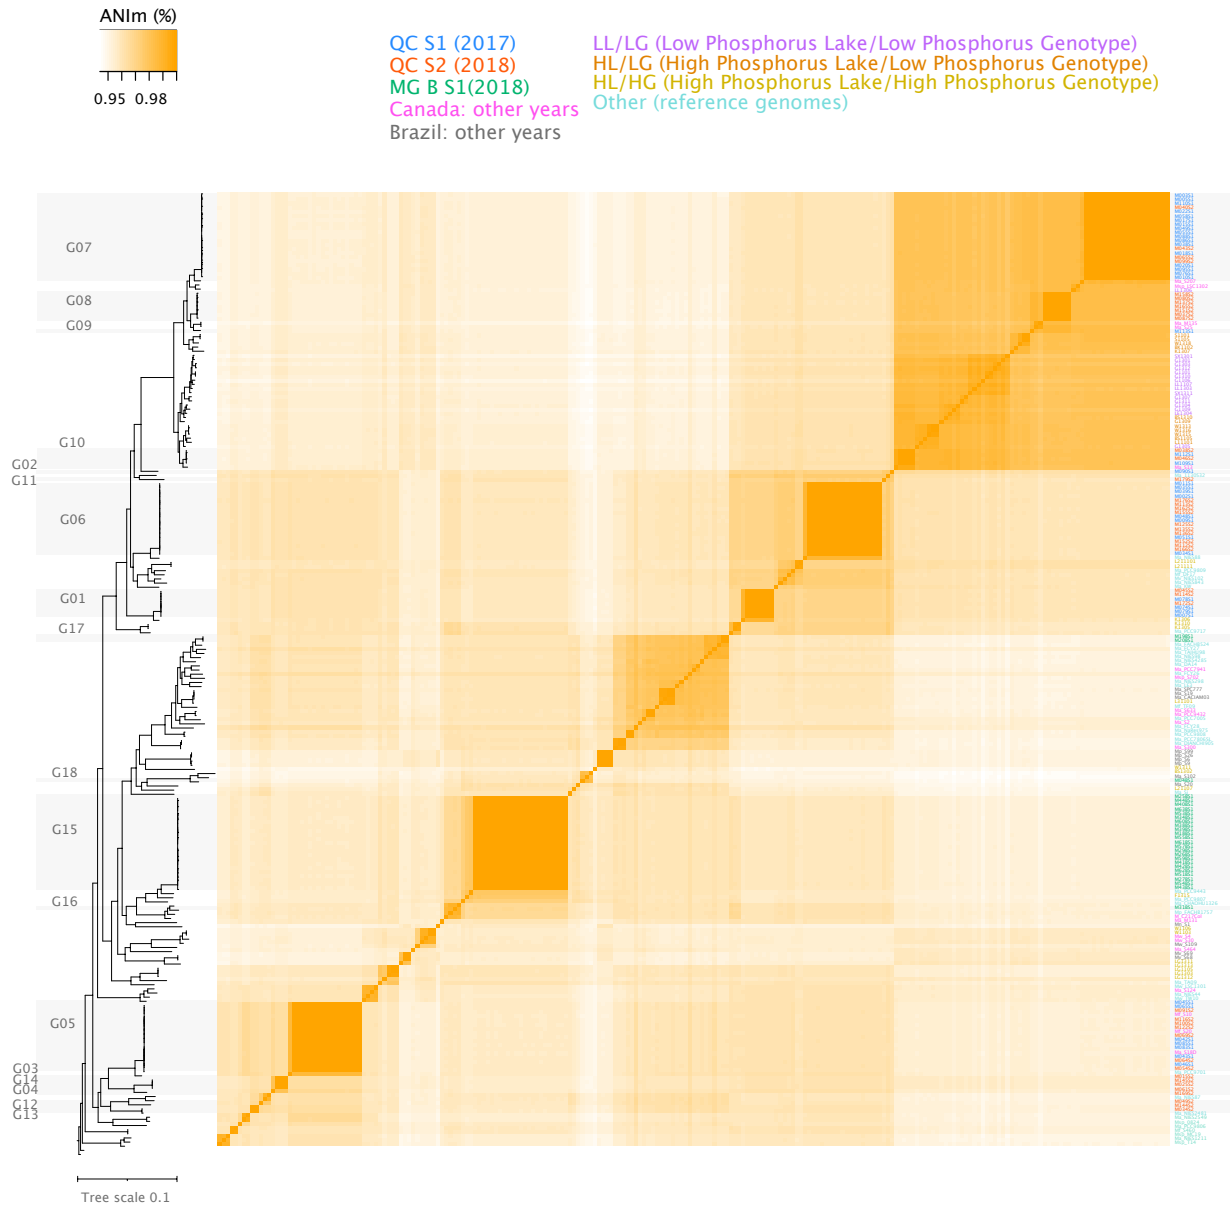

**Fig. S1**

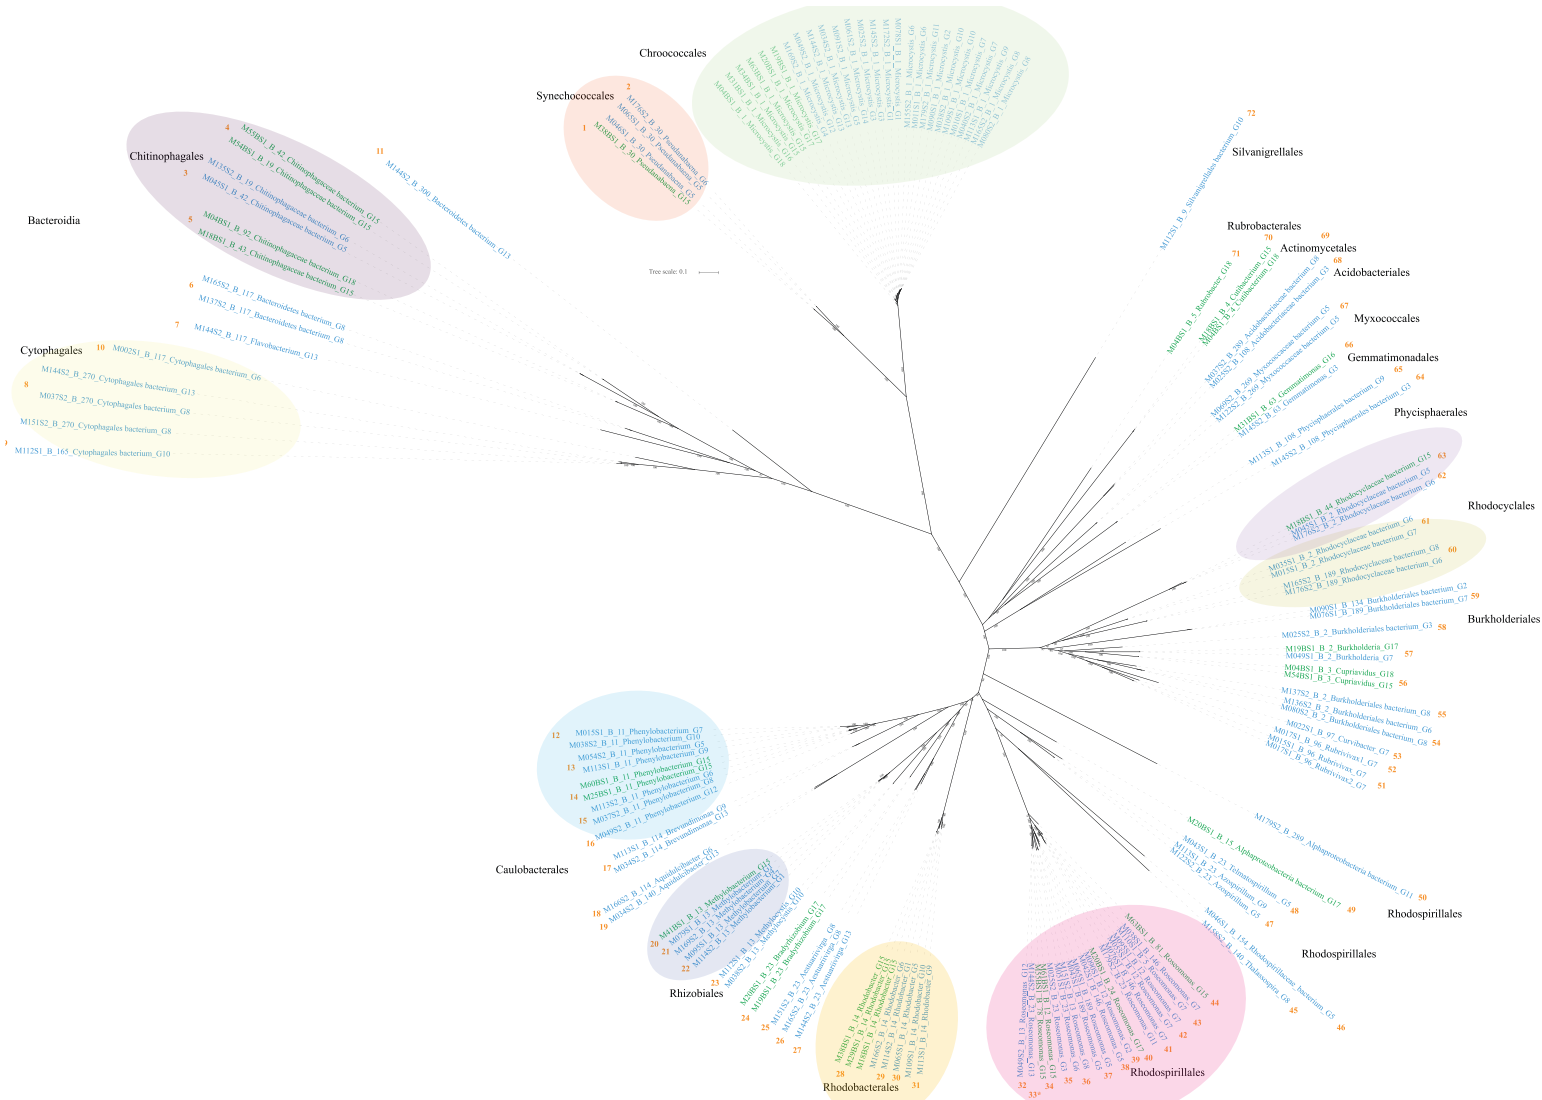

Fig. S2

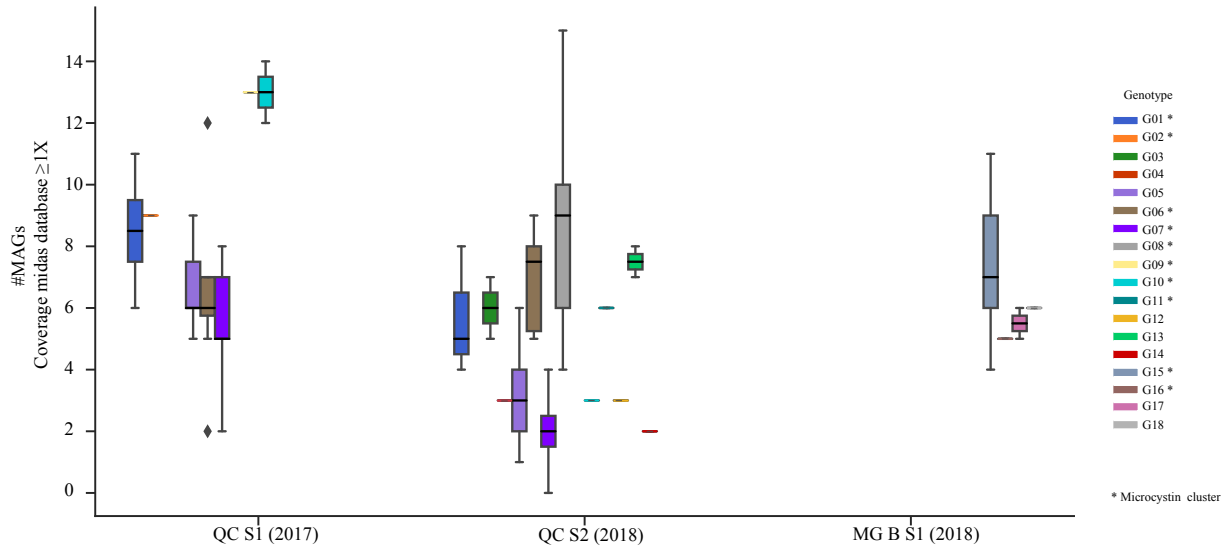

**Fig. S3**

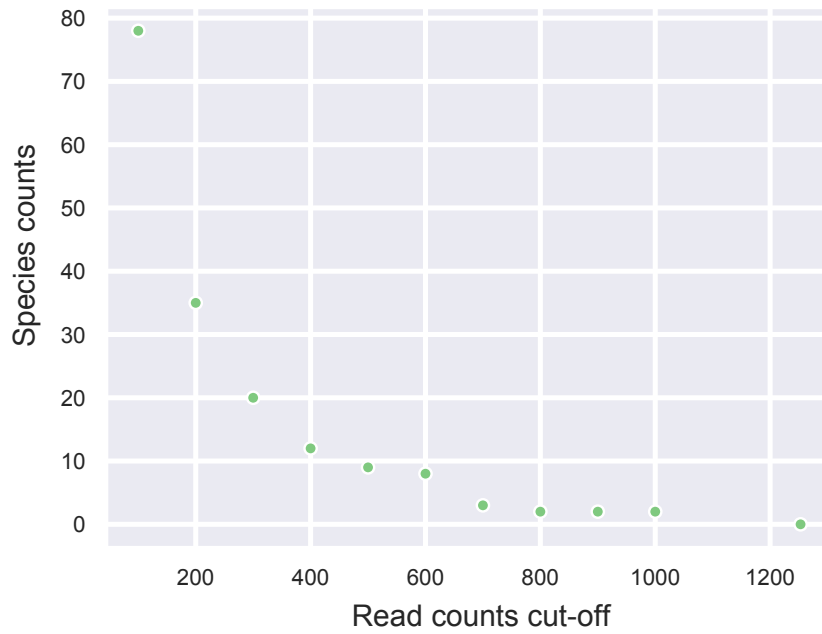

**Fig. S4**

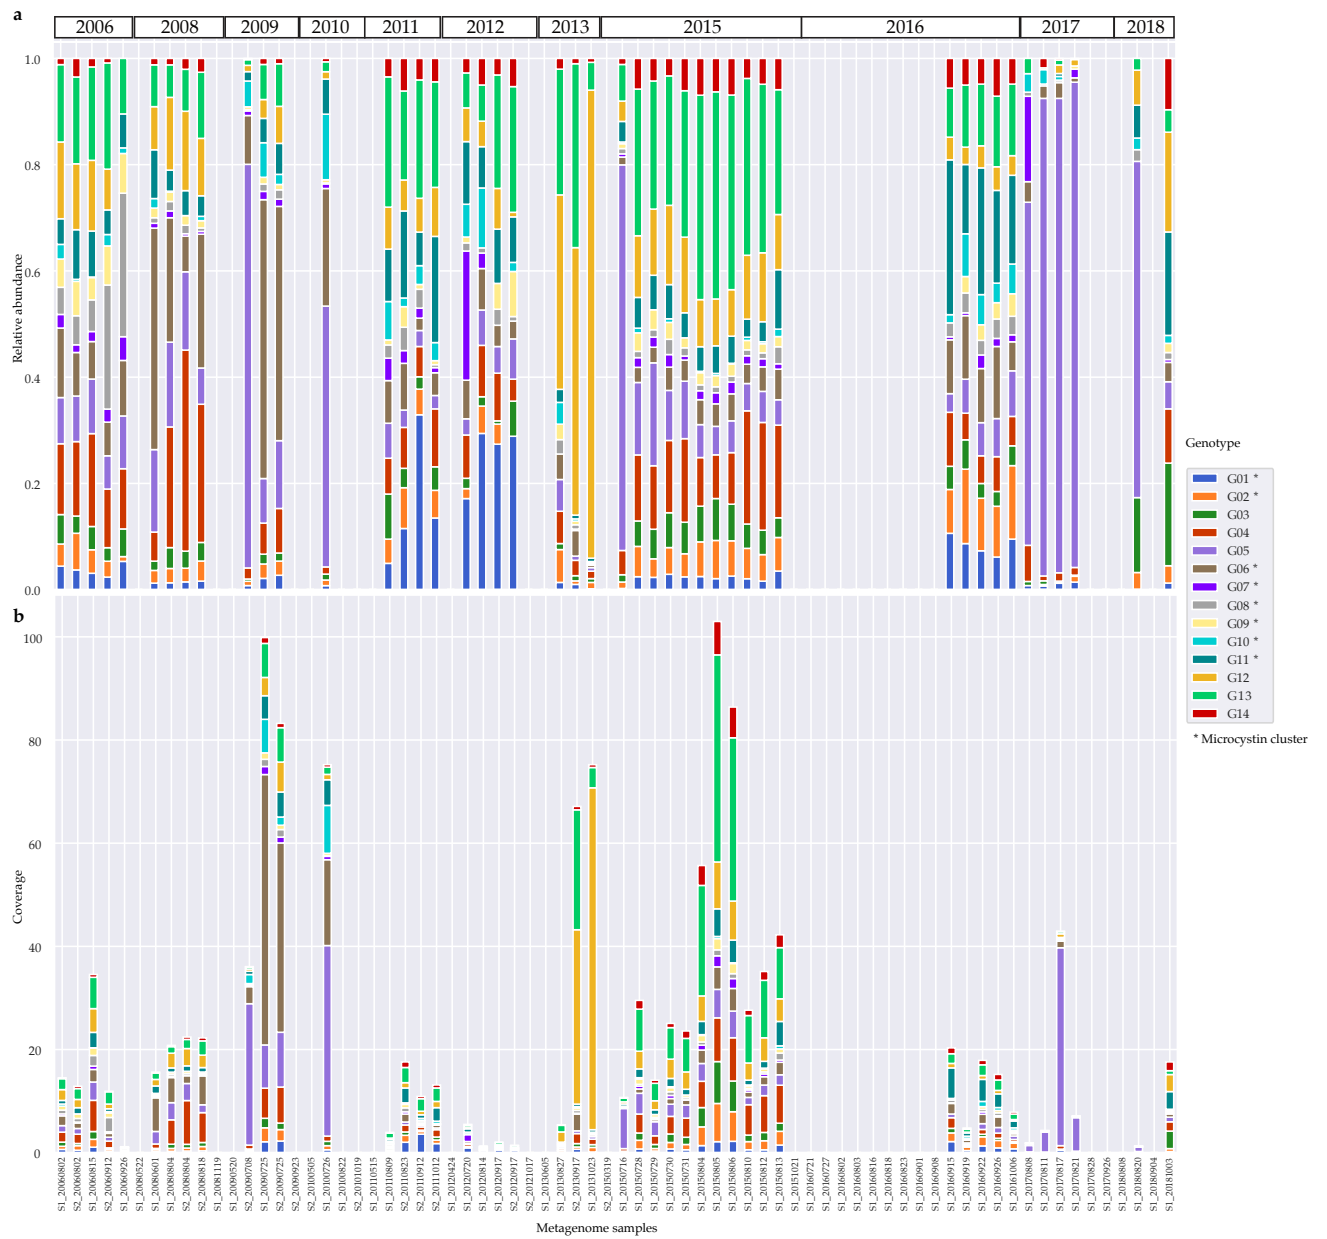

**Fig. S5**



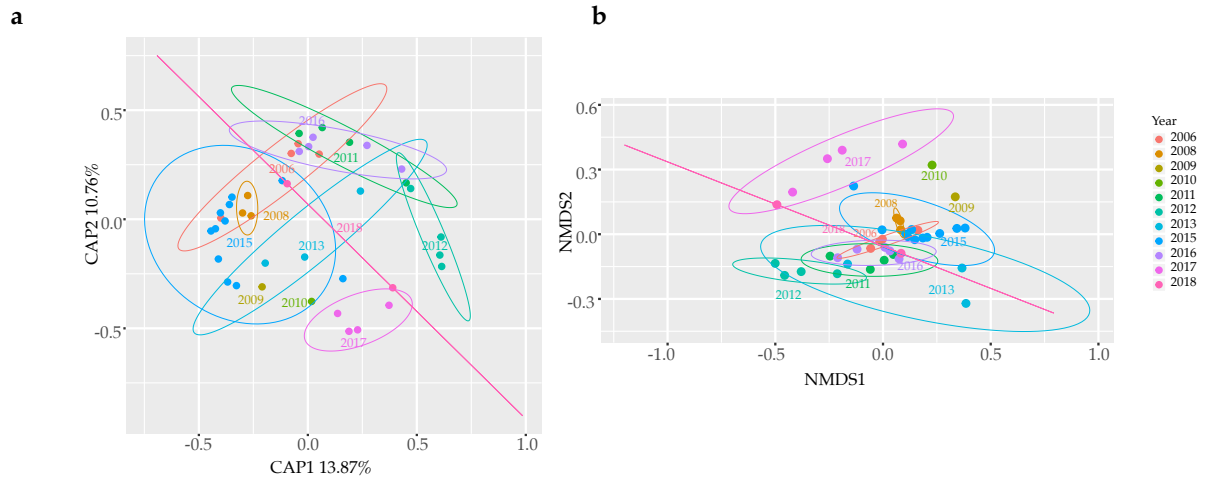

**Fig. S6**

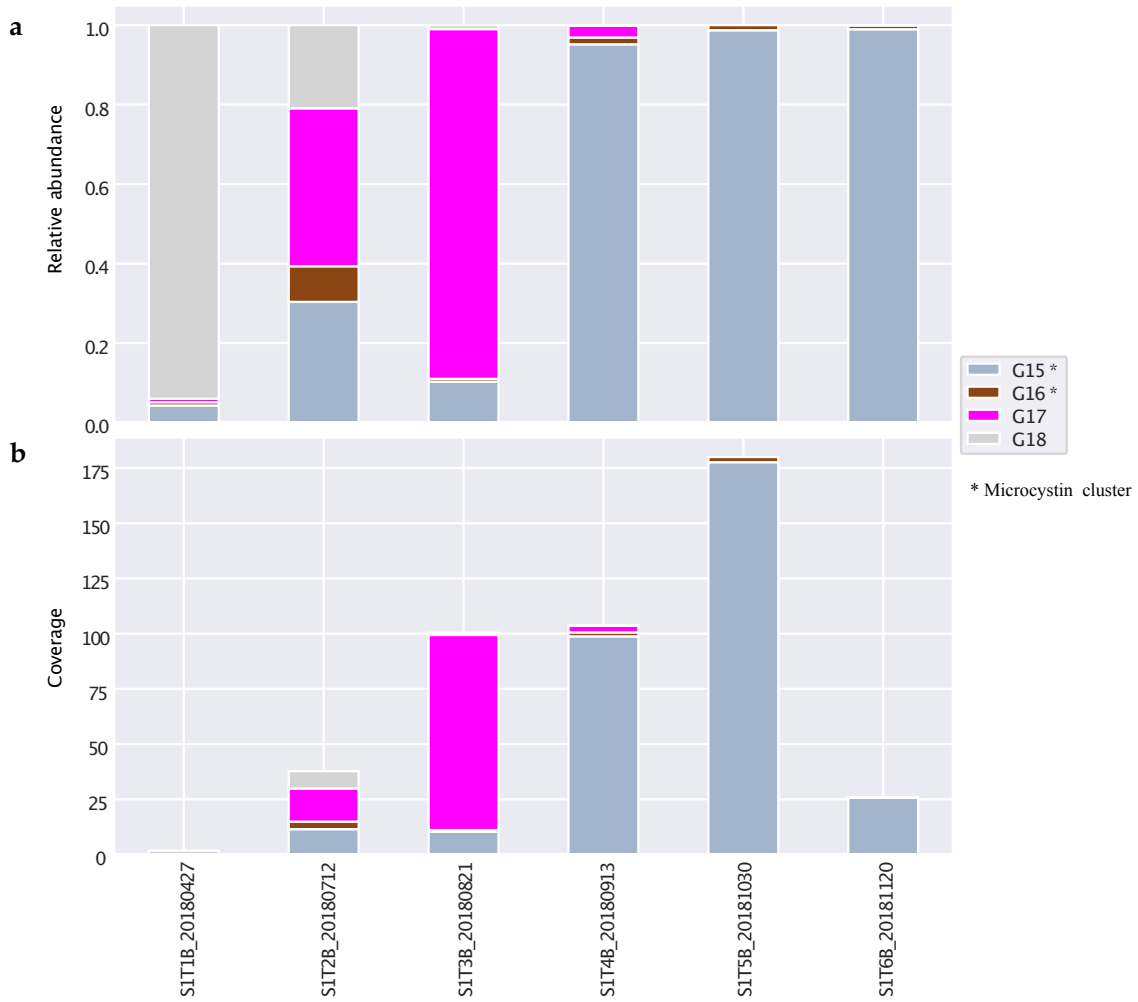

**Fig. S7**

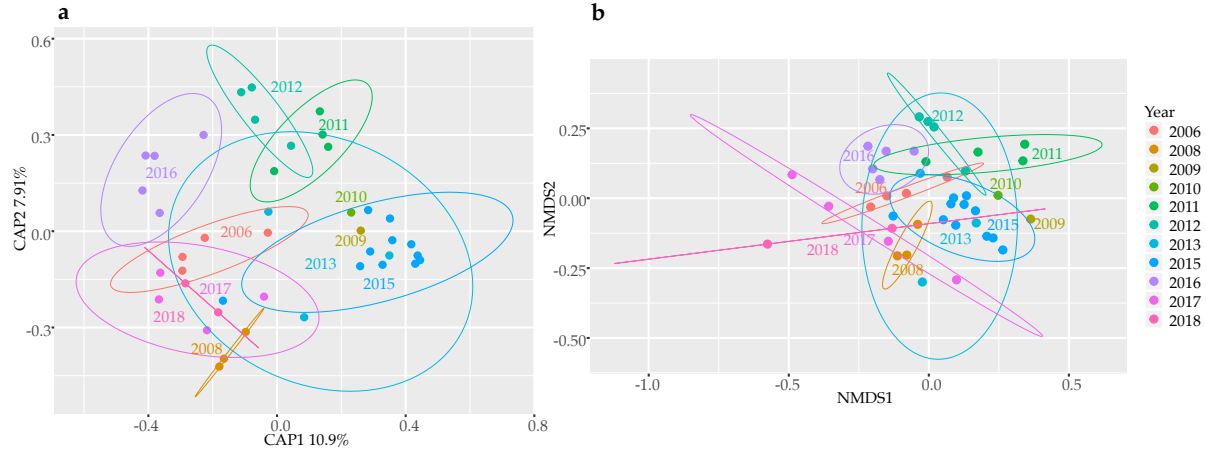

**Fig. S8**

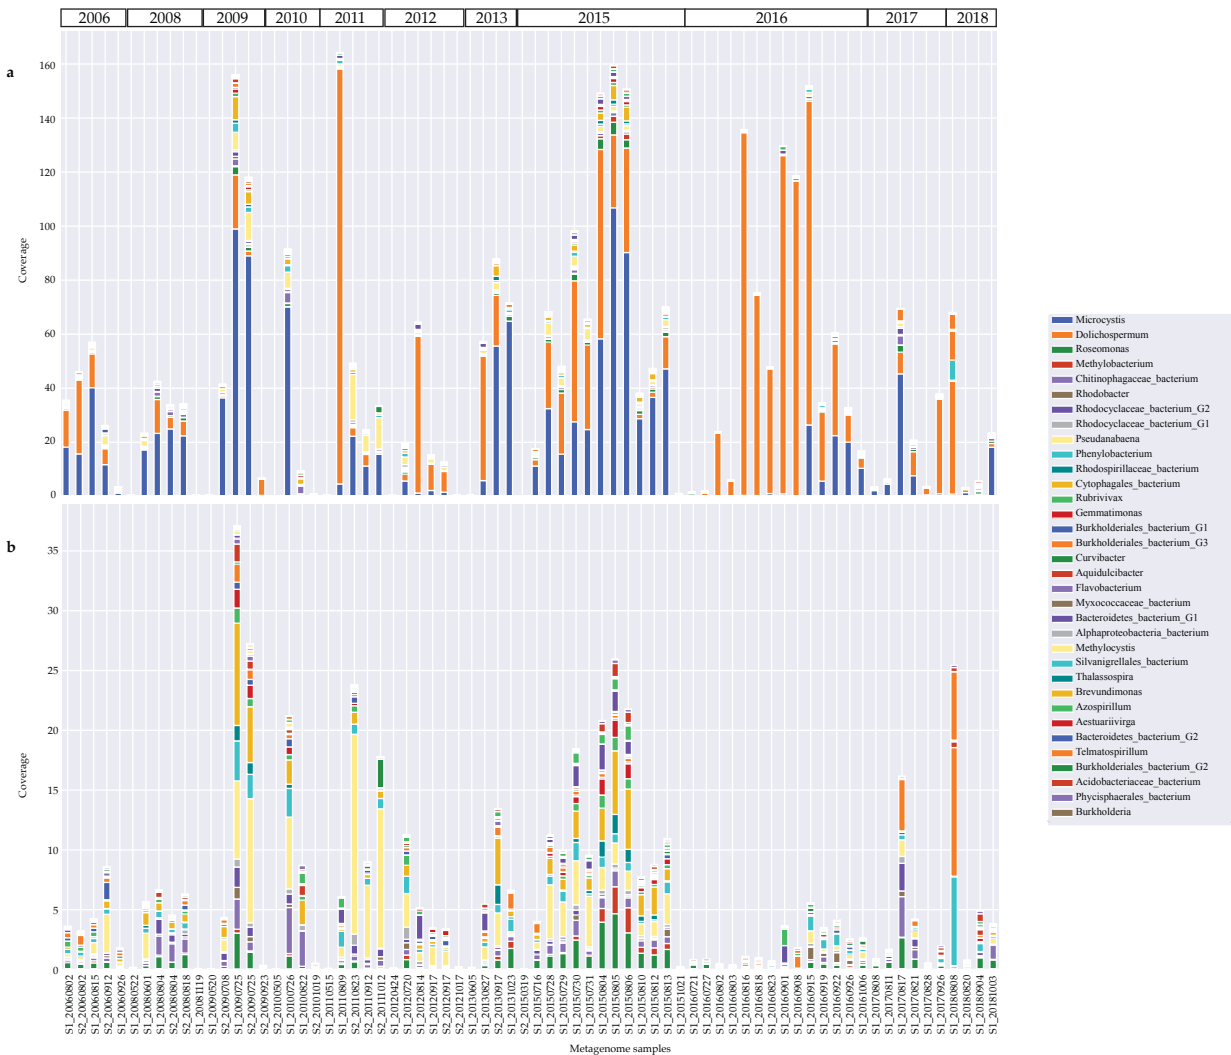

**Fig. S9**

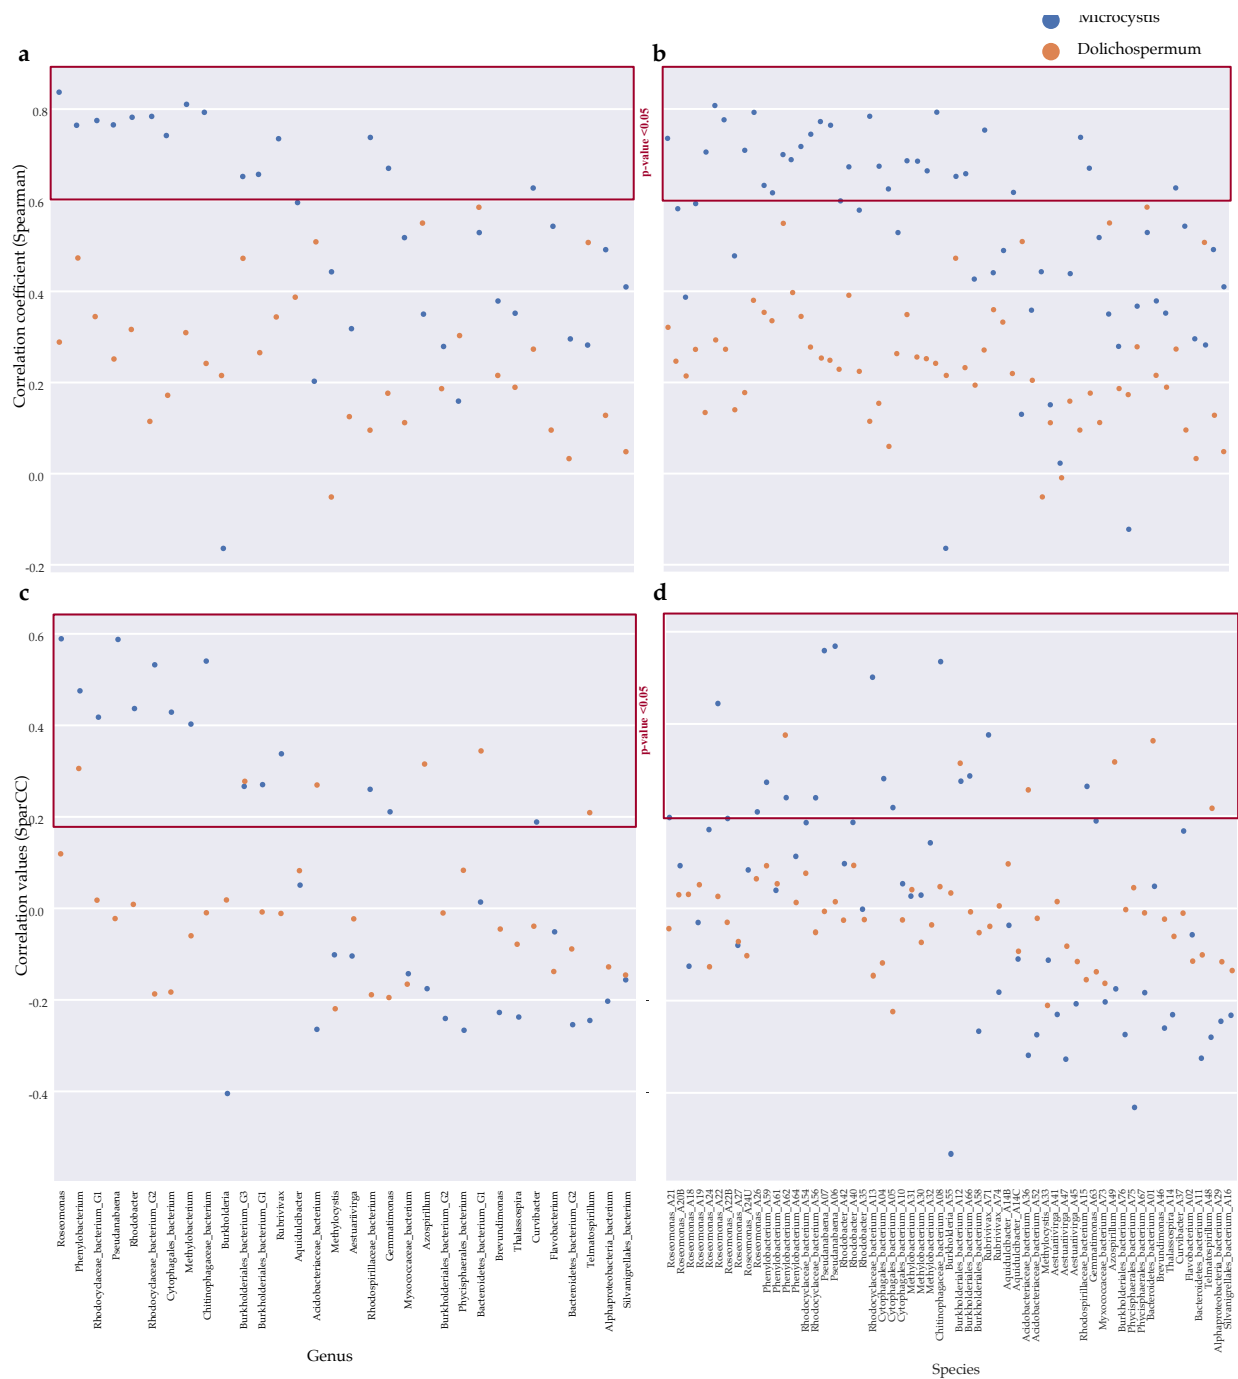

**Fig. S10**

*Microcystis Dolichospermum*

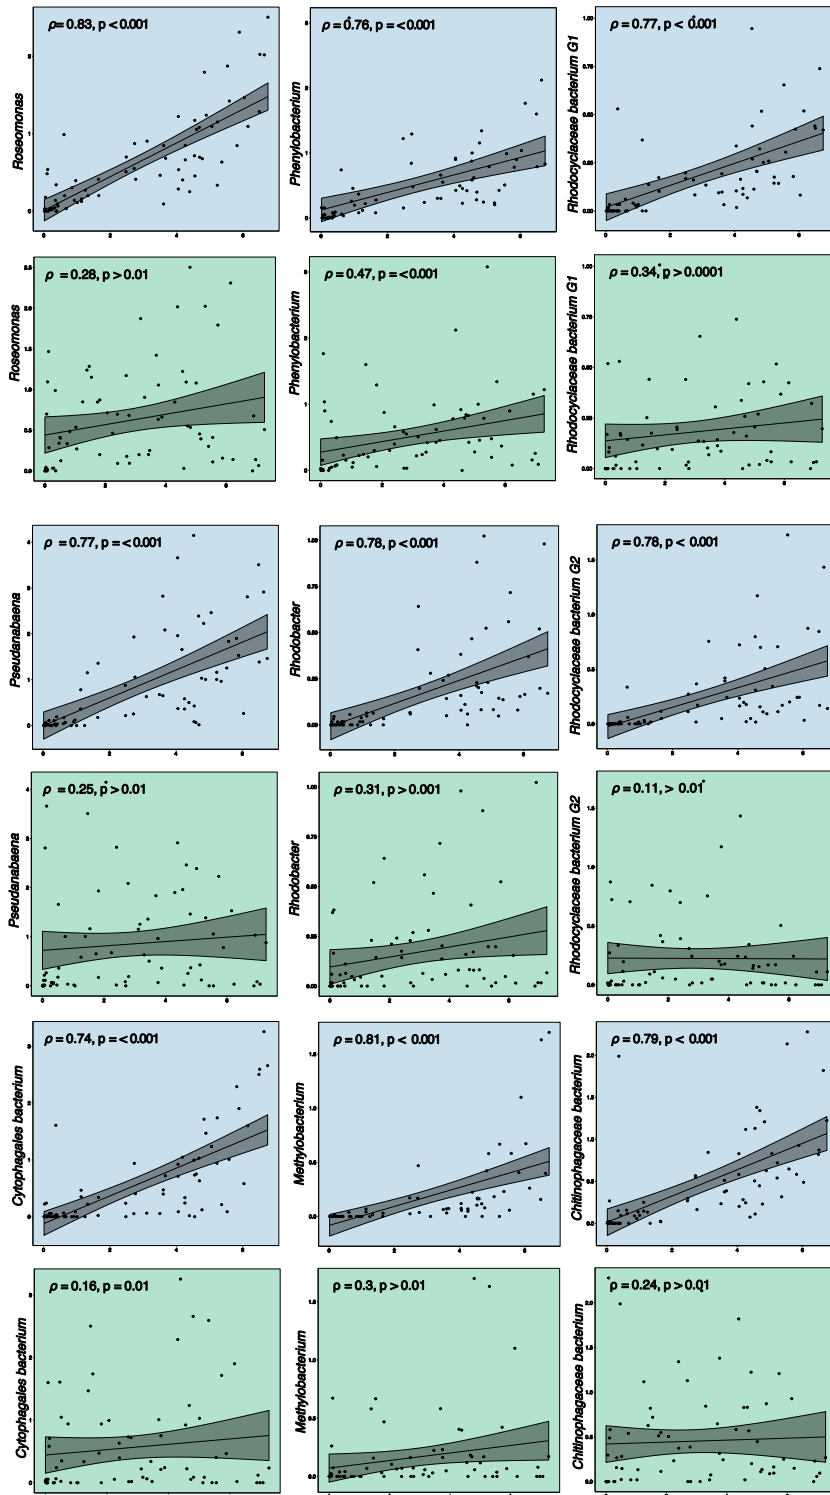

Fig. S11

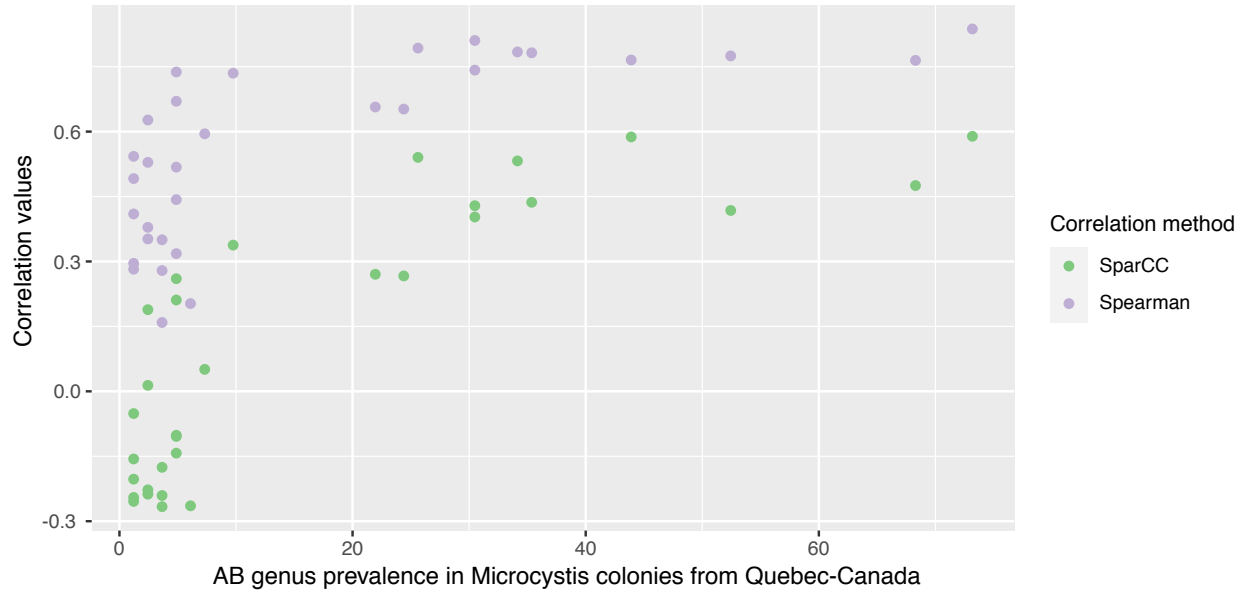

**Fig. S12**

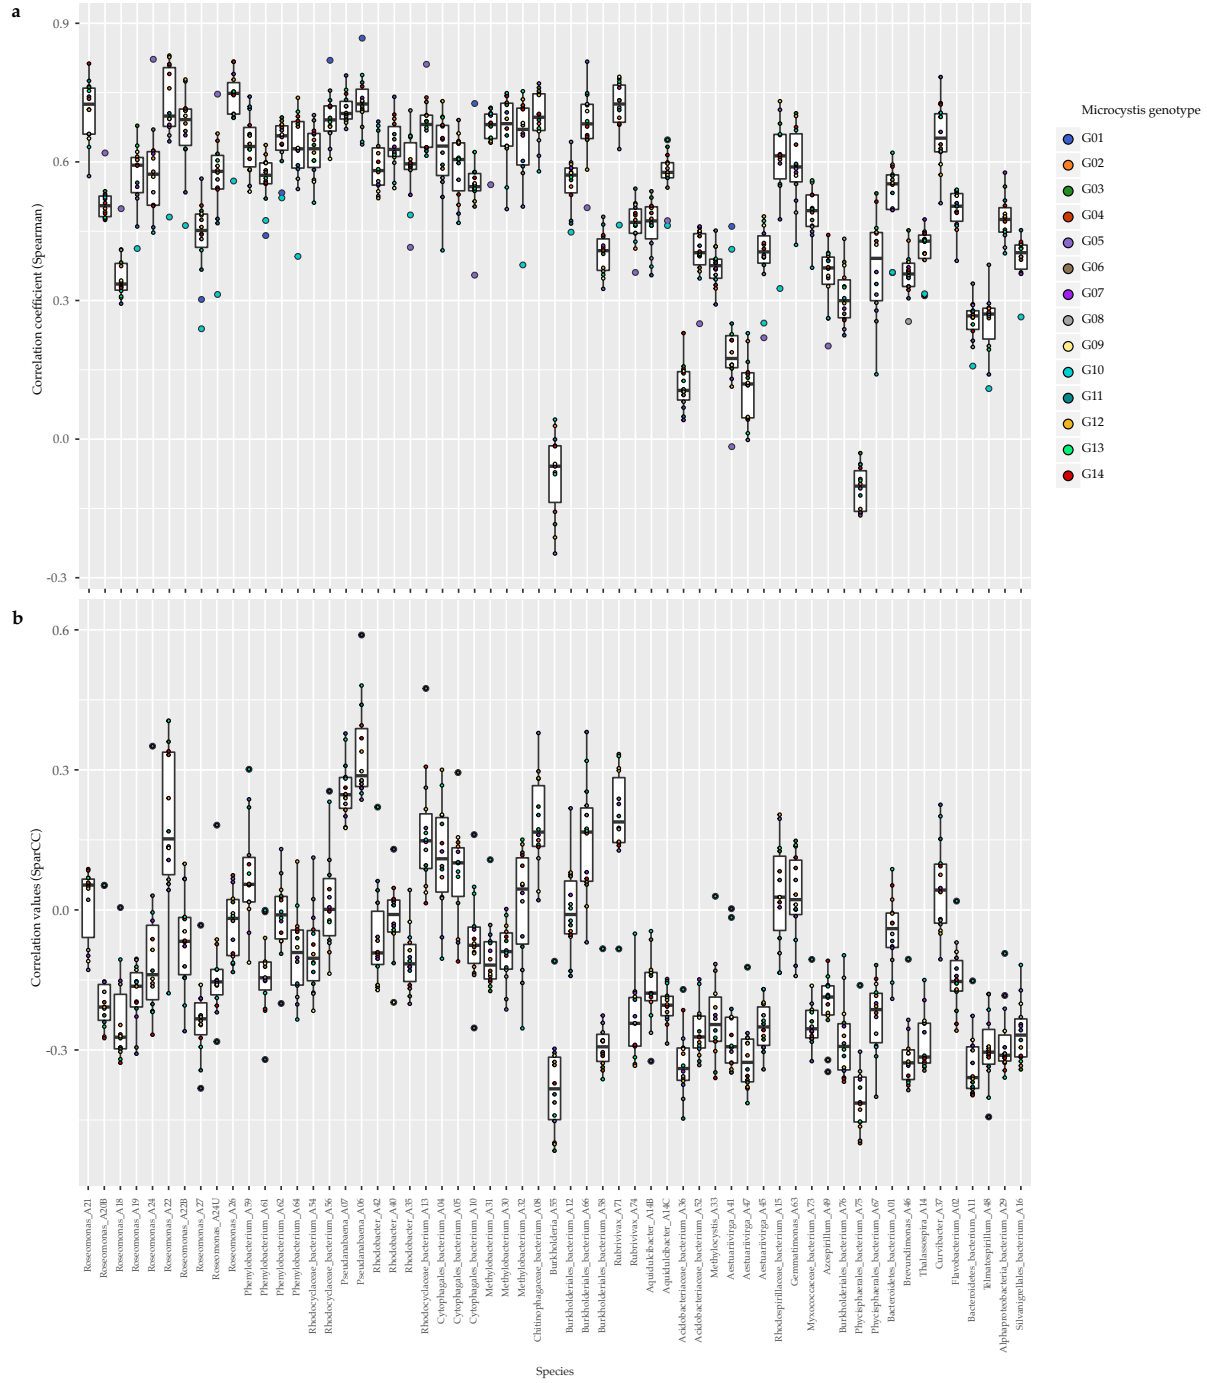

**Fig. S13**

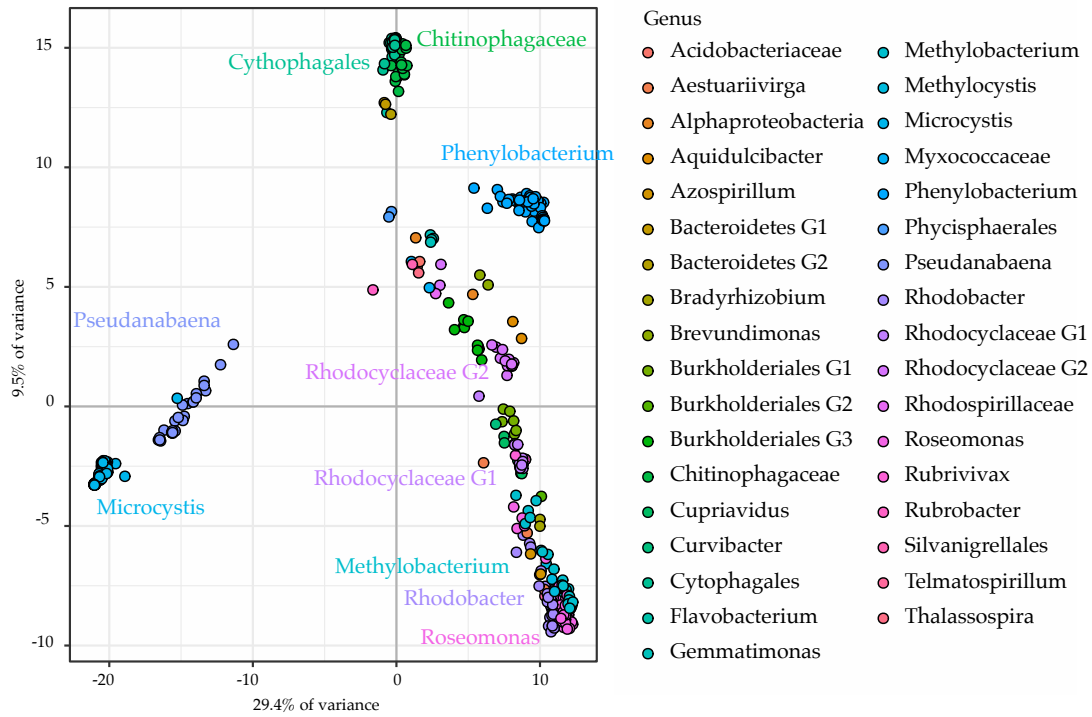

Fig. S14

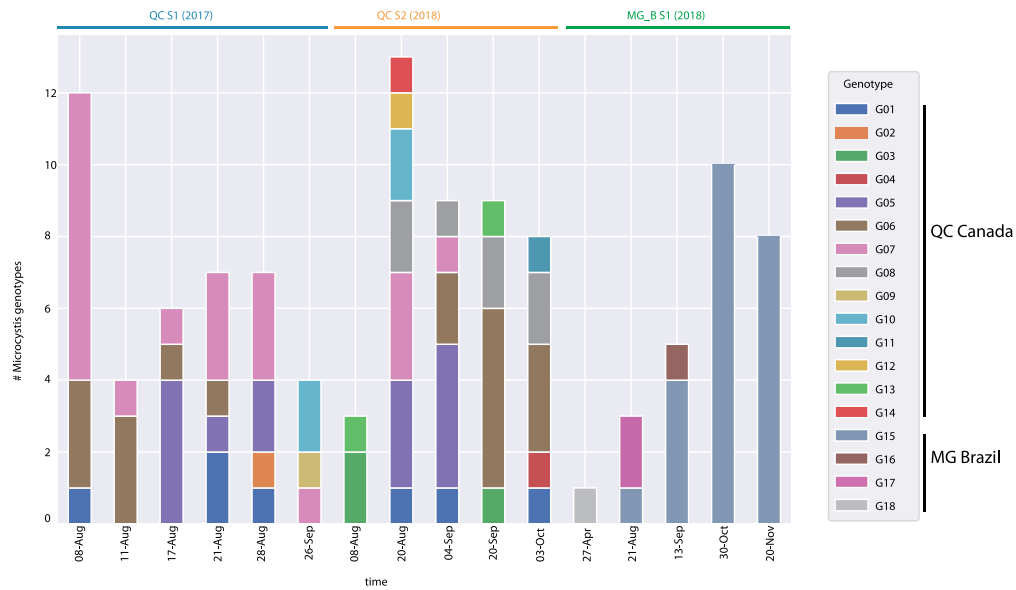

Fig. S15

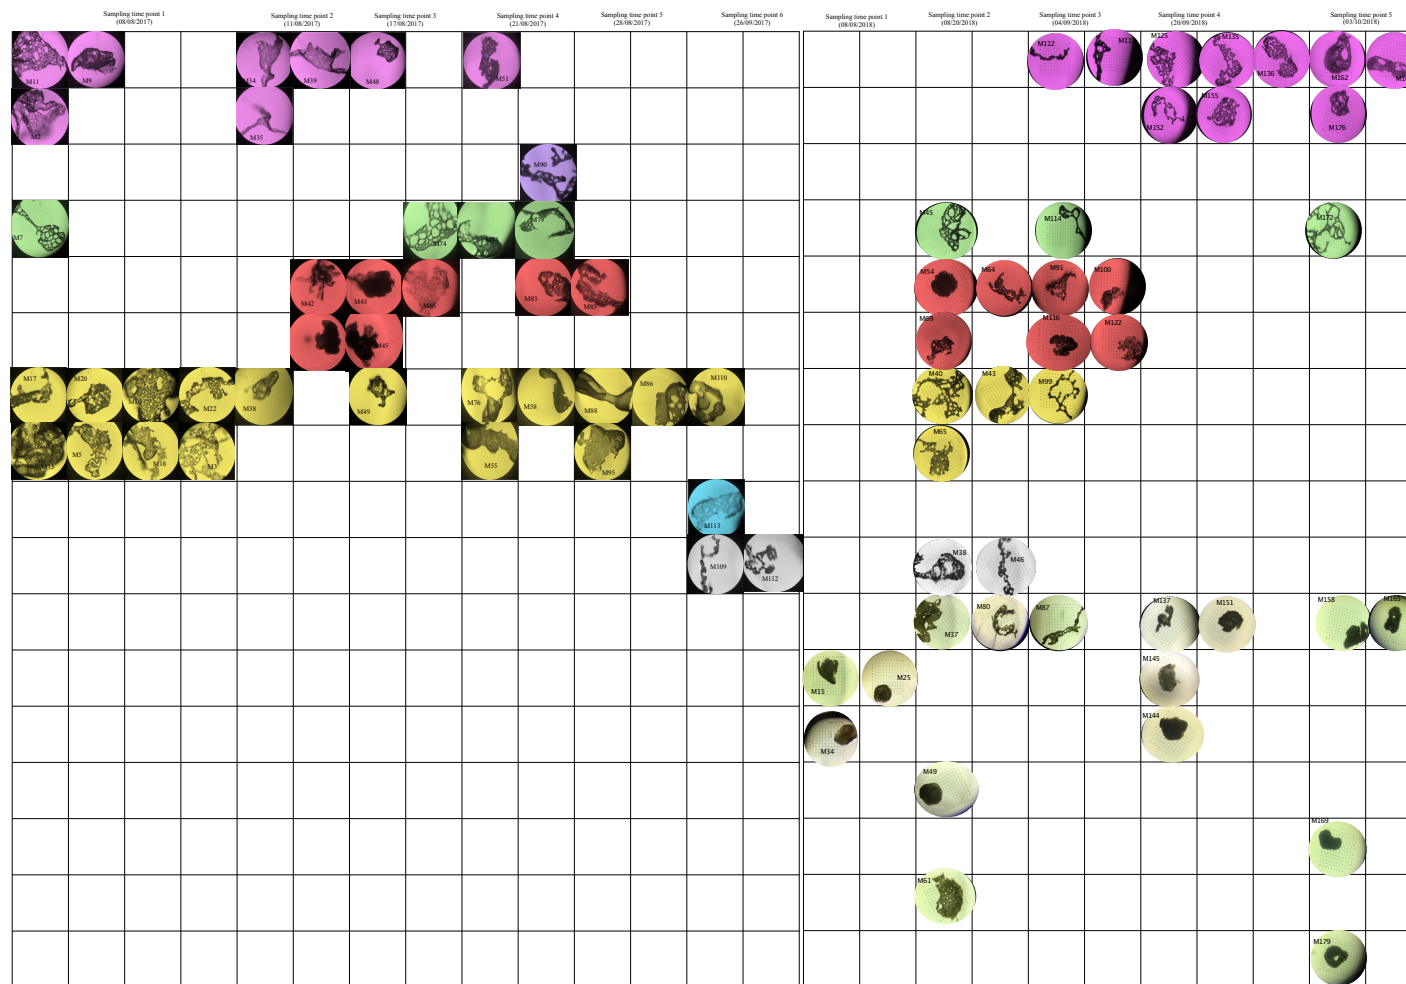

Fig. S16



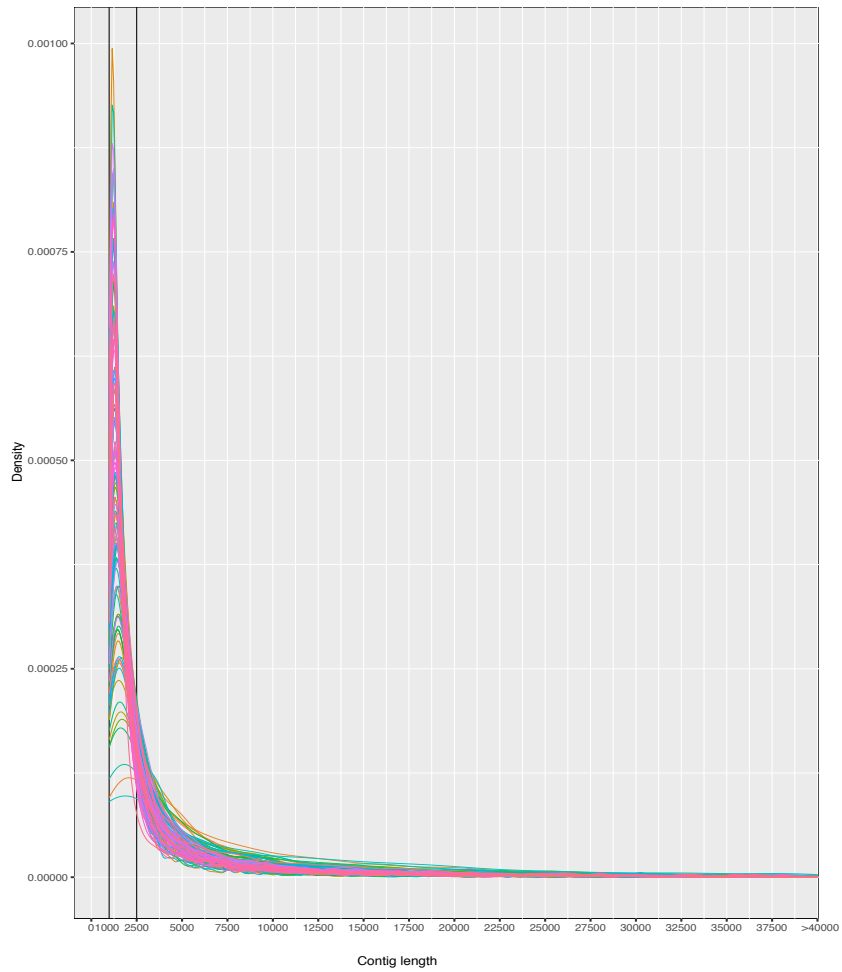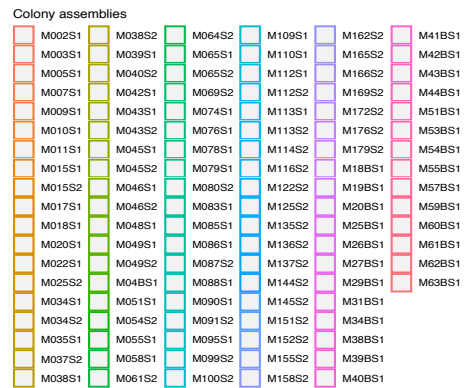

Fig. S17

Tree scale: 0.1

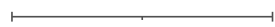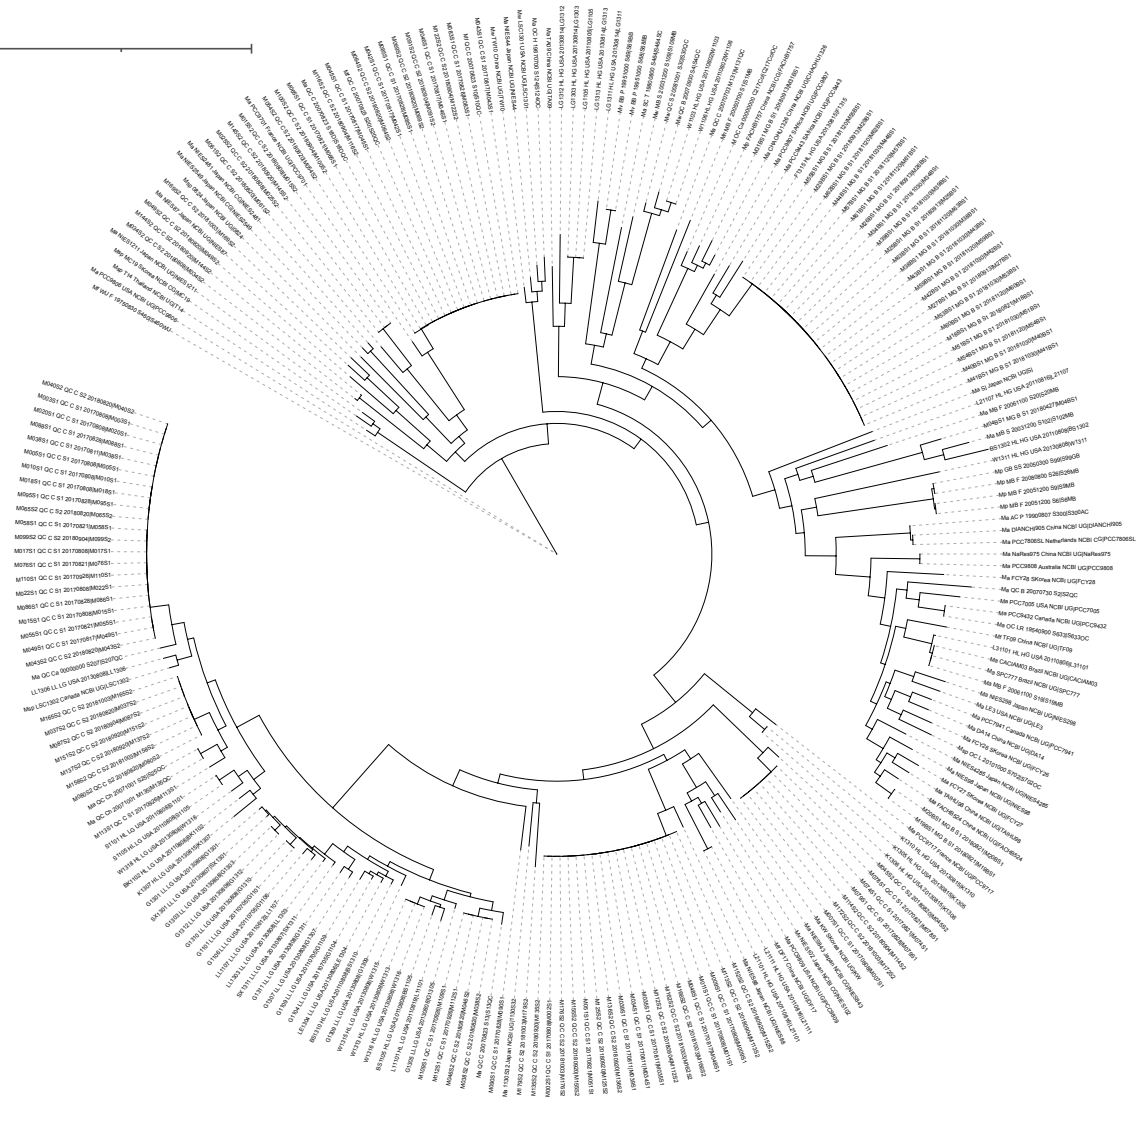

Fig. S18

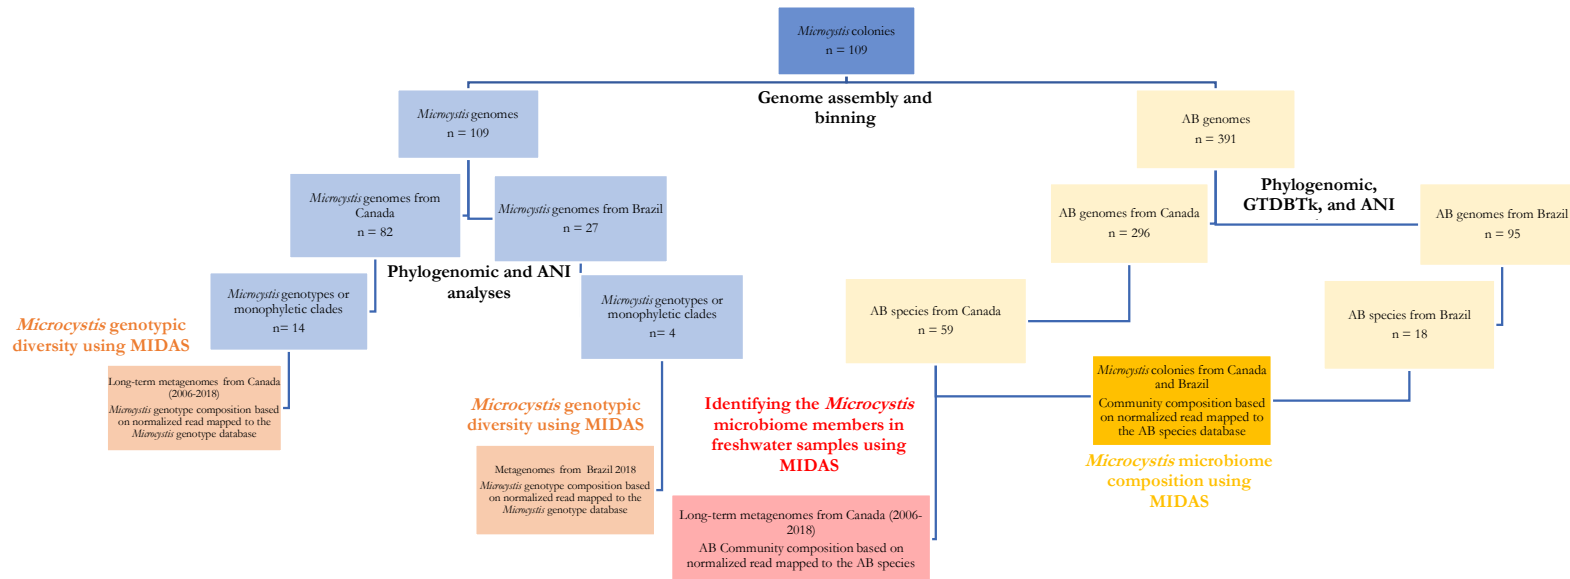

**Fig. S19**

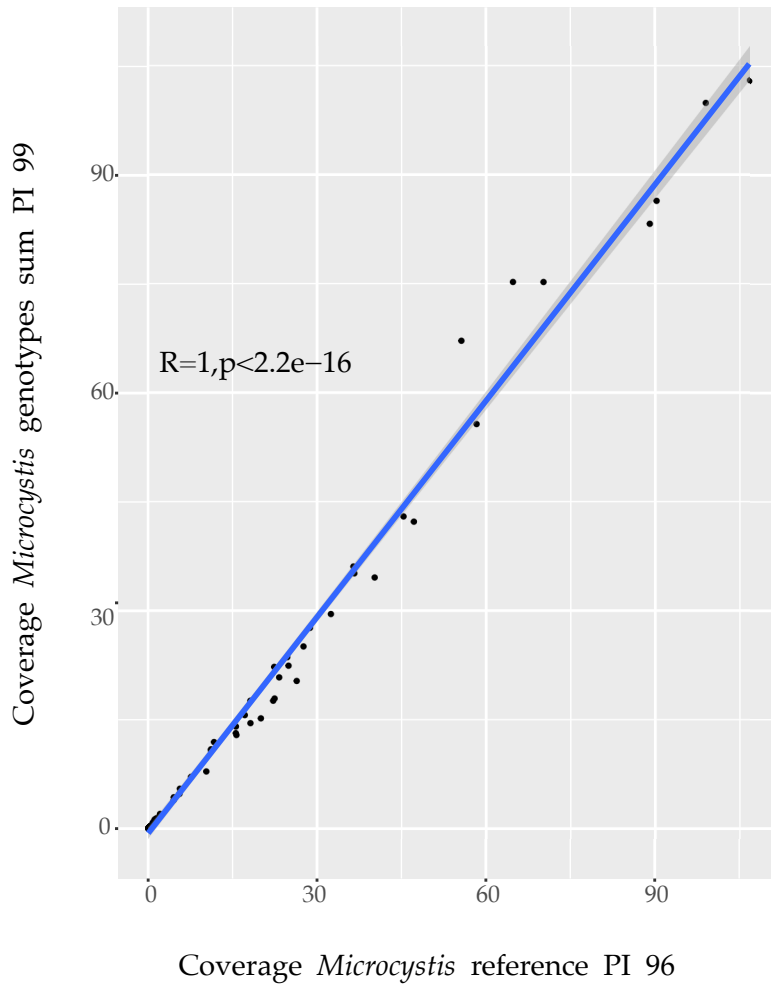

**Fig. S20**

## References:

1. Villanueva RAM, Chen ZJ. ggplot2: Elegant Graphics for Data Analysis, 2nd edition. Meas-Interdiscip Res. 2019;17:160-7.
